# Supplementary material for: Genome-wide transcriptional adaptation to salt stress in Populus
Source: BMC Plant Biol. 2019 Aug 20;19:367. doi: 10.1186/s12870-019-1952-2 (PMC6701017; doi:10.1186/s12870-019-1952-2)
Supplement: Supplementary file 7 — Table S1. Summary of sequencing data. (XLSX 12 kb) [file 12870_2019_1952_MOESM7_ESM.xlsx]

## Sheet: STAT_result
Biological Sample	Sequencing Sample	Raw Reads Number	Raw Bases Number	Clean Reads Number	Clean Reads Rate(%)	Clean Bases Number
CK-r1	JLJG01A	57435984	8615397600	56656046	98.64	8498406900
CK-r2	JLJG01B	61031132	9154669800	60259570	98.74	9038935500
CK-r3	JLJG01C	54362606	8154390900	53604740	98.61	8040711000
T1H1-r1	JLJG01D	60069124	9010368600	59283802	98.69	8892570300
T1H1-r2	JLJG01E	77531972	11629795800	76432026	98.58	11464803900
T1H1-r3	JLJG01F	53272864	7990929600	52557190	98.66	7883578500
T1H3-r1	JLJG01G	55048152	8257222800	54245886	98.54	8136882900
T1H3-r2	JLJG01H	57154912	8573236800	56451210	98.77	8467681500
T1H3-r3	JLJG01I	57666364	8649954600	56801154	98.5	8520173100
T1H6-r1	JLJG01J	55358924	8303838600	54627354	98.68	8194103100
T1H6-r2	JLJG01K	55921546	8388231900	54990976	98.34	8248646400
T1H6-r3	JLJG01L	57342100	8601315000	56613926	98.73	8492088900
T1H12-r1	JLJG01M	51581004	7737150600	50847168	98.58	7627075200
T1H12-r3	JLJG01N	54356086	8153412900	53609576	98.63	8041436400
T1H12-r3	JLJG01O	49994388	7499158200	49313670	98.64	7397050500
CK2-r1	LLJLJG01P	56640152	8496022800	53864150	95.1	8079622500
CK2-r2	JLJG02A	44369212	6655381800	43765380	98.64	6564807000
CK2-r3	JLJG02B	47673424	7151013600	47072822	98.74	7060923300
T2H1-r1	JLJG02C	43335444	6500316600	42857134	98.9	6428570100
T2H1-r2	JLJG02D	45534174	6830126100	44946368	98.71	6741955200
T2H1-r3	JLJG02E	51088336	7663250400	50465288	98.78	7569793200
T2H3-r1	JLJG02F	51921992	7788298800	51265550	98.74	7689832500
T2H3-r2	JLJG02G	52934330	7940149500	52336434	98.87	7850465100
T2H3-r3	JLJG02H	55074840	8261226000	54334898	98.66	8150234700
T2H6-r1	JLJG02I	45840270	6876040500	45230906	98.67	6784635900
T2H6-r2	JLJG02J	62498588	9374788200	61082040	97.73	9162306000
T2H6-r3	JLJG02K	69439346	10415901900	68590654	98.78	10288598100
T2H12-r1	JLJG02L	58805334	8820800100	58023192	98.67	8703478800
T2H12-r2	JLJG02M	59901064	8985159600	59148422	98.74	8872263300
T2H12-r3	JLJG02N	62204298	9330644700	60781406	97.71	9117210900
