# Supplementary material for: Genome-wide transcriptional adaptation to salt stress in Populus
Source: BMC Plant Biol. 2019 Aug 20;19:367. doi: 10.1186/s12870-019-1952-2 (PMC6701017; doi:10.1186/s12870-019-1952-2)
Supplement: Supplementary file 8 — Table S2. Summary of DEGs between individual time point and the corresponding control samples identified by edgeR analysis. (XLSX 9 kb) [file 12870_2019_1952_MOESM8_ESM.xlsx]

## Sheet: Sheet1
Table S2. Summary of DEGs between individual time point and the corresponding control samples identified by edgeR analysis
	Up-regulated	Down-regulated	Total DEGs
T1H1/CK1	1327	844	2171
T1H3/CK1	1085	907	1992
T1H6/CK1	1893	1597	3490
T1H12/CK1	4291	4080	8371
CK2/CK1	649	402	1051
T2H1/CK2	127	52	179
T2H3/CK2	2356	2507	4863
T2H6/CK2	528	344	872
T2H12/CK2	1198	902	2100
